# Supplementary material for: Systematic integration of experimental data and models in systems biology
Source: Springer Nature journal article supplement (doi:10.1186/1471-2105-11-582), 2010-11-29

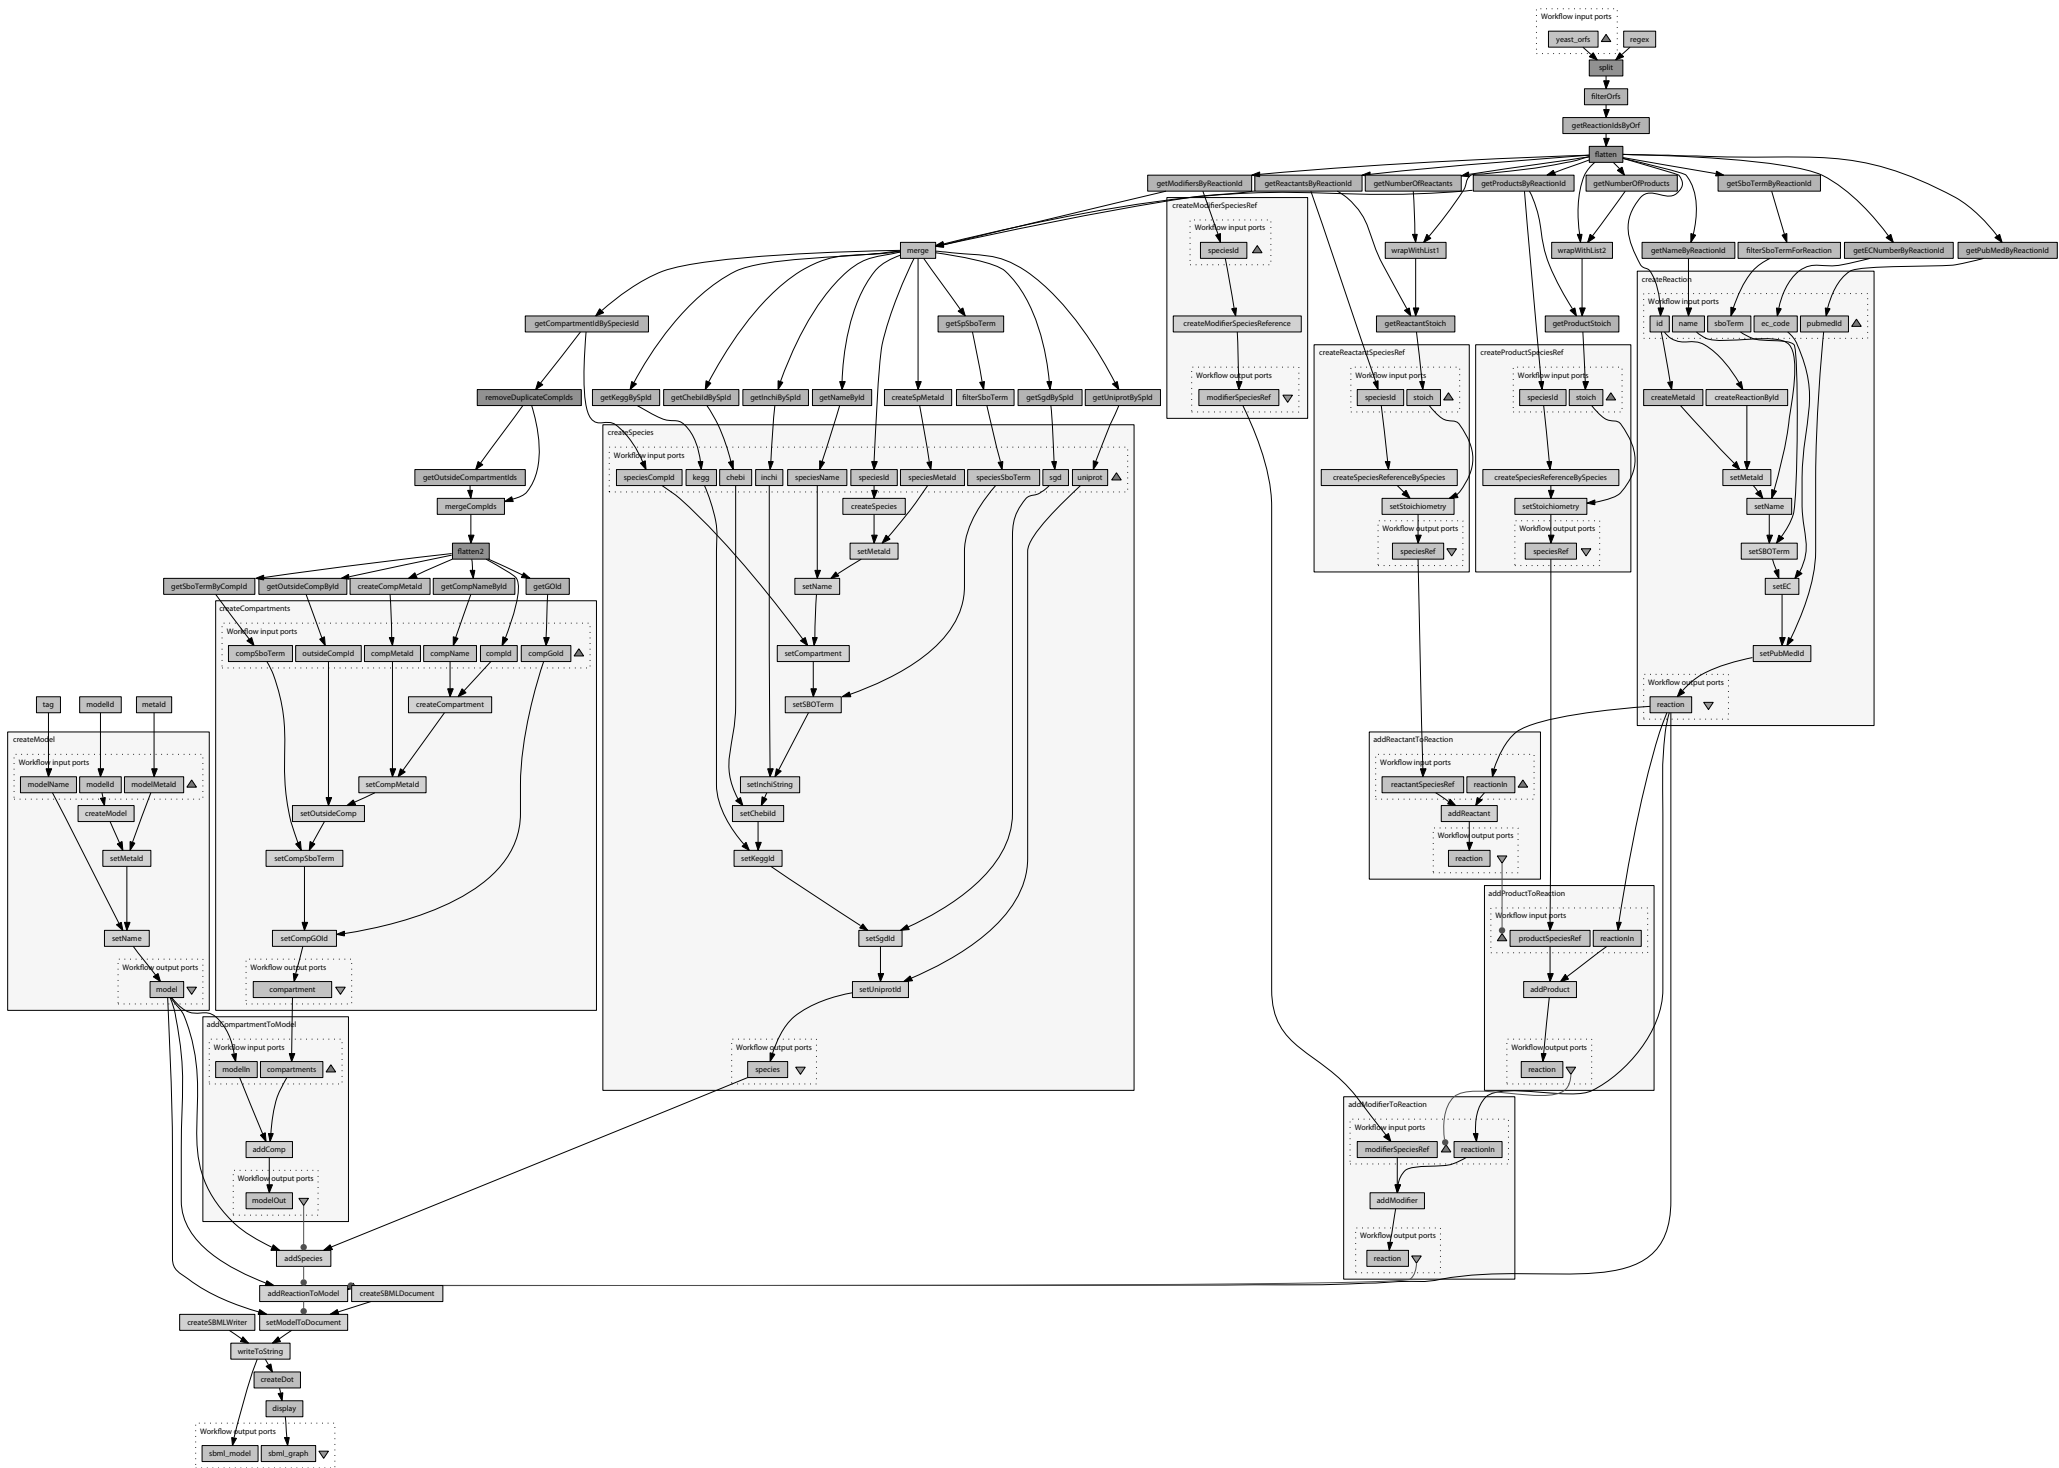

Supplement: 12859_2010_4165_MOESM6_ESM.pdf [file 12859_2010_4165_MOESM6_ESM.pdf]
