# Supplementary material for: Systematic integration of experimental data and models in systems biology
Source: Springer Nature journal article supplement (doi:10.1186/1471-2105-11-582), 2010-11-29
Supplement: 12859_2010_4165_MOESM7_ESM.pdf [file 12859_2010_4165_MOESM7_ESM.pdf]

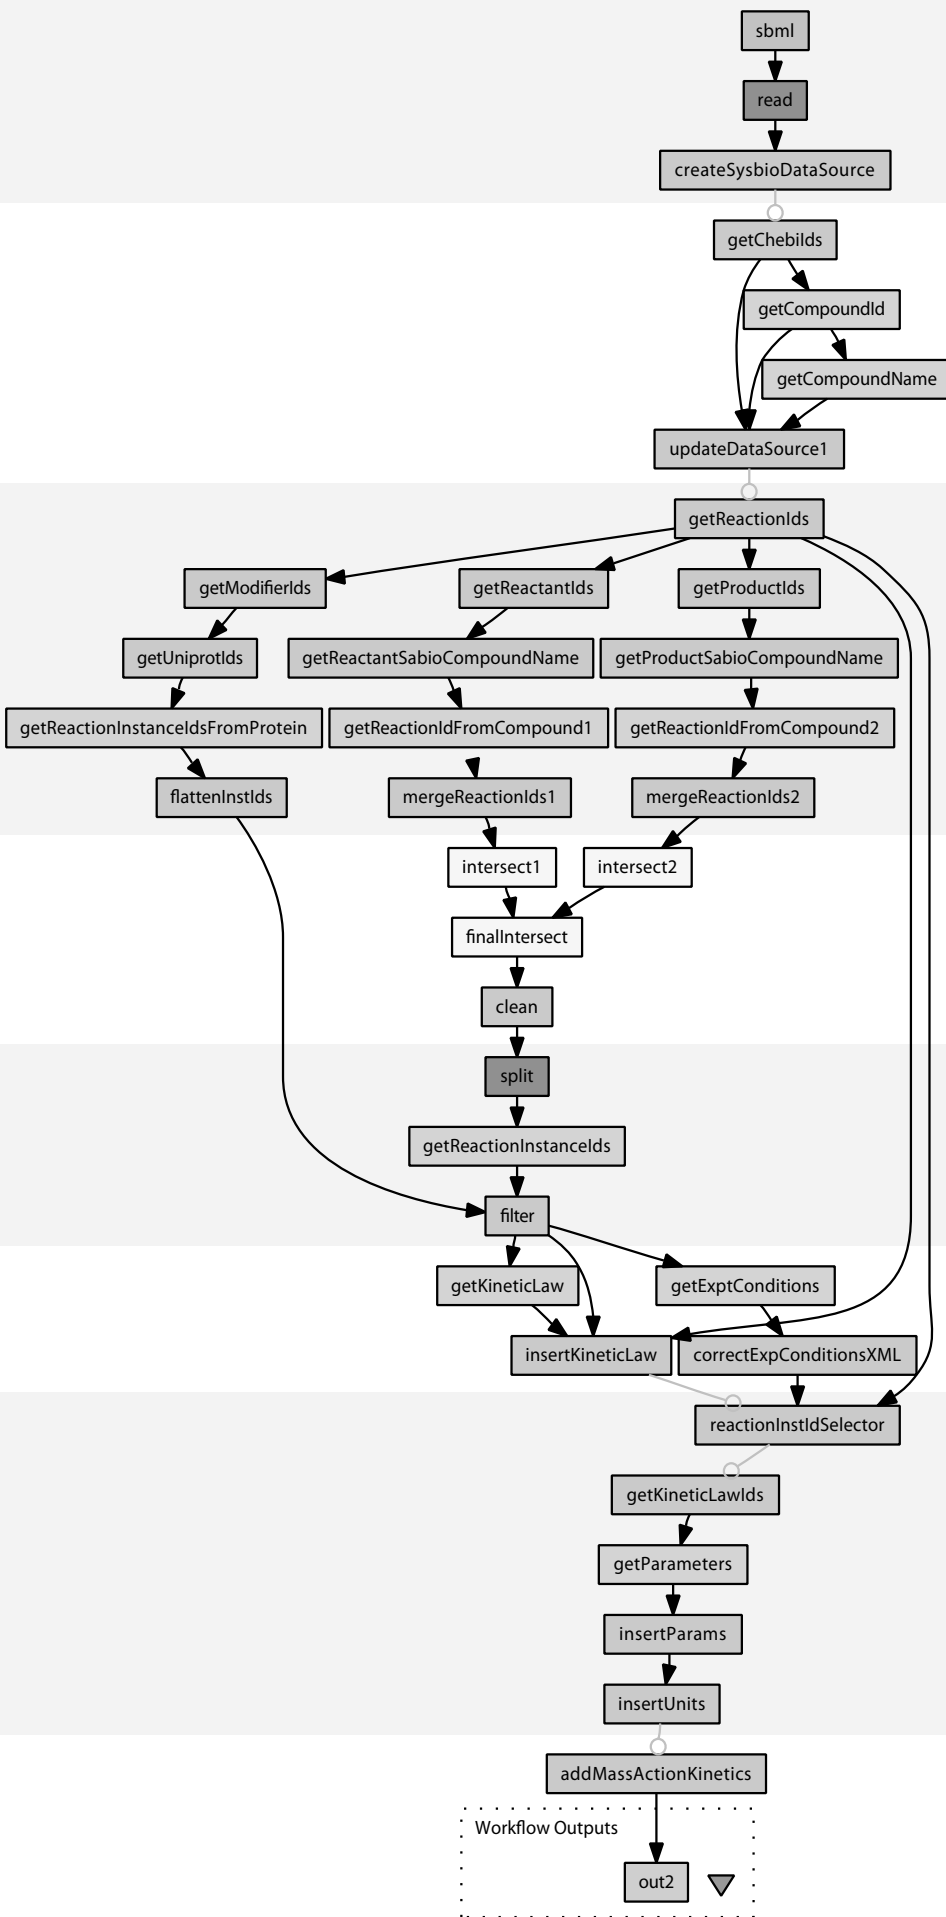

Parse SBML data

Get metabolite chebi ids

Query reactions in SABIO-RK based on sets of metabolite chebi ids and enzyme Uniprot ids

Find common reaction ids using R

Get instance ids

Get experimental conditions

Select kinetics data, get parameters and create units

Create parameterised SBML model

Workflow Outputs

out2 ▼
